# Supplementary material for: Effect of Cheese Intake on Cardiovascular Diseases and Cardiovascular Biomarkers
Source: MDPI journal article supplement (doi:10.3390/nu14142936), 2022-07-18
Supplement: s1 [file s1]

Supplementary Table S1. Baseline characteristics of cheese intake, cardiovascular diseases, and cardiovascular biomarkers

| Trait                     | Year | Author       | Population                    | Sample Size | n case | n control | n SNP      |
|---------------------------|------|--------------|-------------------------------|-------------|--------|-----------|------------|
| Cheese intake             | 2018 | Ben Elsworth | European                      | 451,486     | -      | -         | 9,851,867  |
| Cardiovascular diseases   |      |              |                               |             |        |           |            |
| Coronary heart disease    | 2015 | Nikpay       | European (~74%), Asian (~26%) | 184,305     | 60,801 | 123,504   | 9,455,779  |
| Hypertension              | 2021 | -            | European                      | 218,792     | 42,857 | 175,935   | 16,380,466 |
| Atrial fibrillation       | 2021 | -            | European                      | 127,442     | 10,516 | 116,926   | 16,379,586 |
| Heart failure             | 2020 | Shah S       | European                      | 977,323     | 47,309 | 930,014   | 7,773,021  |
| Type 2 diabetes           | 2012 | Morris       | European                      | 149,821     | 34,840 | 114,981   | 127,904    |
| Ischemic stroke           | 2018 | Malik R      | European                      | 440,328     | 34,217 | 406,111   | 7,537,579  |
| Transient ischemic attack | 2021 | -            | European                      | 214,634     | 8,835  | 205,799   | 16,380,437 |
| Pulmonary embolism        | 2021 | -            | European                      | 218,792     | 4,185  | 214,607   | 16,380,466 |
| Peripheral artery disease | 2021 | -            | European                      | 218,792     | 1,037  | 217,755   | 16,380,466 |
| Cardiac death             | 2021 | -            | European                      | 218,792     | 7,563  | 211,229   | 16,380,466 |
| Cardiovascular biomarkers |      |              |                               |             |        |           |            |
| Systolic blood pressure   | 2018 | Evangelou, E | European                      | 757,601     | -      | -         | 7,088,083  |
| Diastolic blood pressure  | 2018 | Evangelou, E | European                      | 757,601     | -      | -         | 7,160,619  |
| Body mass index           | 2015 | Locke AE     | European                      | 339,224     | -      | -         | 2,555,511  |
| Waist circumference       | 2015 | Shungin D    | European                      | 232,101     | -      | -         | 2,565,408  |
| C-Reactive protein        | 2018 | Ligthart, S  | European                      | 204,402     | -      | -         | 2,414,379  |
| Interleukin 6             | 2018 | Folkersen L  | European                      | 3,394       | -      | -         | 5,270,646  |
| Adiponectin               | 2012 | Dastani Z    | European                      | 39,883      | -      | -         | 2,675,209  |
| Total cholesterol         | 2013 | Willer CJ    | European (83.5%)              | 187,365     | -      | -         | 2,446,982  |
| Triglycerides             | 2013 | Willer CJ    | European 83.5%)               | 177,861     | -      | -         | 2,439,433  |
| HDL                       | 2013 | Willer CJ    | European 83.5%)               | 187,167     | -      | -         | 2,447,442  |
| LDL                       | 2013 | Willer CJ    | European 83.5%)               | 173,082     | -      | -         | 2,437,752  |
| Fasting glucose           | 2012 | Manning AK   | European                      | 58,074      | -      | -         | 2,625,495  |

HDL: high-density lipoprotein; LDL: low-density lipoprotein; SNP: single nucleotide polymorphism

Supplementary Table S2. Single nucleotide polymorphisms used as instrumental variables in the Mendelian randomization analyses of cheese intake

| SNP        | Chr | EA | NEA | Beta   | SE    | Nearby gene  | F   |
|------------|-----|----|-----|--------|-------|--------------|-----|
| rs78876700 | 1   | A  | G   | 0.018  | 0.003 | LOC107985376 | 30  |
| rs531358   | 1   | T  | C   | 0.013  | 0.002 | CCDC18       | 32  |
| rs2802530  | 1   | A  | G   | 0.019  | 0.003 | -            | 30  |
| rs6685323  | 1   | T  | C   | -0.013 | 0.002 | AQP10        | 30  |
| rs2339928  | 2   | A  | G   | 0.015  | 0.002 | ATAD2B       | 37  |
| rs12475594 | 2   | G  | A   | 0.016  | 0.003 | FANCL        | 30  |
| rs504675   | 2   | T  | C   | 0.027  | 0.002 | LINC01833    | 137 |
| rs72970243 | 2   | A  | G   | 0.022  | 0.003 | -            | 43  |
| rs1514755  | 2   | G  | A   | 0.016  | 0.003 | -            | 39  |
| rs79184944 | 3   | A  | T   | 0.020  | 0.003 | -            | 36  |
| rs4296548  | 3   | G  | T   | 0.013  | 0.002 | TRANK1       | 32  |
| rs62245792 | 3   | A  | T   | -0.018 | 0.003 | TAFA1        | 32  |
| rs77742462 | 3   | G  | A   | -0.047 | 0.008 | LINC00636    | 33  |
| rs2352974  | 3   | T  | C   | -0.014 | 0.002 | TRAIP        | 42  |
| rs6774906  | 3   | C  | A   | 0.032  | 0.006 | XXYL1        | 31  |
| rs4681981  | 3   | A  | C   | -0.012 | 0.002 | TASOR        | 31  |
| rs4860341  | 4   | C  | T   | 0.024  | 0.004 | -            | 31  |
| rs73096946 | 4   | C  | T   | -0.021 | 0.003 | -            | 45  |
| rs13107325 | 4   | T  | C   | -0.029 | 0.004 | SLC39A8      | 47  |
| rs10938397 | 4   | G  | A   | -0.013 | 0.002 | -            | 32  |
| rs4692708  | 4   | C  | A   | 0.015  | 0.003 | LOC105377529 | 32  |

|             |    |   |   |        |       |                          |    |
|-------------|----|---|---|--------|-------|--------------------------|----|
| rs26579     | 5  | C | G | -0.013 | 0.002 | LINC00461/MEF2C-AS2      | 31 |
| rs6873324   | 5  | C | A | -0.012 | 0.002 | GALNT10/LOC10798646<br>5 | 30 |
| rs9504123   | 6  | C | A | 0.014  | 0.003 | LOC105374894             | 32 |
| rs975303    | 6  | G | A | 0.021  | 0.003 | LOC105374958             | 54 |
| rs1931805   | 6  | C | T | 0.013  | 0.002 | KHDRBS2                  | 32 |
| rs113367286 | 7  | T | C | 0.015  | 0.002 | -                        | 37 |
| rs34198643  | 7  | T | C | -0.017 | 0.003 | MAD1L1                   | 39 |
| rs12672200  | 7  | A | G | -0.014 | 0.002 | -                        | 33 |
| rs9649582   | 7  | T | A | -0.015 | 0.002 | CHCHD3                   | 37 |
| rs7012814   | 8  | A | G | -0.019 | 0.002 | -                        | 67 |
| rs7386207   | 8  | T | C | -0.012 | 0.002 | -                        | 30 |
| rs13257887  | 8  | C | T | 0.016  | 0.003 | MSRA                     | 40 |
| rs3911016   | 9  | G | T | 0.021  | 0.003 | LOC105376121             | 39 |
| rs4503172   | 9  | T | C | 0.013  | 0.002 | TTLL11                   | 32 |
| rs1806771   | 10 | G | T | -0.022 | 0.004 | ARID5B                   | 30 |
| rs73335955  | 10 | C | T | 0.028  | 0.005 | SORCS3                   | 31 |
| rs10896050  | 11 | T | G | -0.018 | 0.003 | -                        | 42 |
| rs67238148  | 11 | T | G | 0.017  | 0.003 | OR10A6                   | 37 |
| rs7936836   | 11 | A | C | 0.016  | 0.002 | HSD17B12                 | 49 |
| rs73024305  | 11 | C | G | 0.033  | 0.005 | SLC37A2                  | 44 |
| rs12786959  | 11 | T | A | -0.016 | 0.003 | CHORDC1                  | 32 |
| rs524468    | 12 | G | A | -0.014 | 0.003 | SLC6A13                  | 31 |
| rs1024853   | 12 | G | C | -0.013 | 0.002 | -                        | 32 |
| rs7298331   | 12 | C | A | -0.013 | 0.002 | -                        | 33 |
| rs12296440  | 12 | A | G | 0.019  | 0.003 | -                        | 40 |

|            |    |   |   |        |       |                |    |
|------------|----|---|---|--------|-------|----------------|----|
| rs61953351 | 12 | T | G | 0.015  | 0.003 | OASL           | 32 |
| rs1073242  | 13 | A | G | 0.016  | 0.002 | -              | 47 |
| rs11620149 | 13 | C | T | -0.018 | 0.003 | -              | 30 |
| rs17115145 | 14 | T | C | -0.013 | 0.002 | PRKD1          | 32 |
| rs35270670 | 15 | G | A | 0.016  | 0.003 | WHAMM          | 37 |
| rs4776970  | 15 | T | A | 0.015  | 0.002 | MAP2K5         | 44 |
| rs12447542 | 16 | A | G | 0.020  | 0.003 | RBFOX1         | 34 |
| rs61734410 | 16 | T | C | 0.017  | 0.003 | CAC-1H         | 40 |
| rs62034322 | 16 | A | G | -0.014 | 0.002 | IL27           | 37 |
| rs71386942 | 16 | A | C | 0.014  | 0.003 | PKD1L3         | 33 |
| rs11649653 | 16 | G | C | 0.014  | 0.002 | -              | 37 |
| rs919109   | 17 | C | G | 0.020  | 0.003 | HOXB6/HOXB-AS3 | 38 |
| rs2854175  | 17 | A | C | 0.017  | 0.003 | -              | 44 |
| rs12951057 | 17 | G | C | -0.021 | 0.003 | NSF/LRRC37A2   | 48 |
| rs2960578  | 18 | G | T | 0.017  | 0.002 | NPC1           | 58 |
| rs1434511  | 18 | T | C | 0.013  | 0.002 | MIR4527HG      | 33 |
| rs1291145  | 20 | C | T | -0.02  | 0.002 | SAMHD1         | 71 |
| rs6126641  | 20 | A | G | 0.013  | 0.002 | LOC105372666   | 30 |
| rs62236533 | 22 | A | G | 0.025  | 0.004 | -              | 46 |

Chr: chromosome; EA: effect allele; NEA: non-effect allele; SE: standard error; SNP: single-nucleotide polymorphisms.
